# Supplementary material
Source: publisher figshare collection journal article supplement (https://tandf.figshare.com/ndownloader/files/20411049)
Supplement: Supplementary file 1 [file 20411049]

**Supplemental Material:**

**Implicit task – reaction times analysis**

A repeated measures ANOVA for reaction times with prime type (angry, happy, and neutral) as the within-subjects factor and group membership (healthy controls vs. patients) as the between-subjects factor revealed non - significant effects for prime type (F(2, 188) = 0.528, p=0.590 η2 = 0.006), group (F(1, 94) = 0.009, p=0.926), and their interaction (F(2, 188) = 0.738, p=0.480 η2 = 0.008).

**Implicit and explicit task – Site differences**

Some differences across sites were demonstrated. Comparisons of symptom severity showed higher positive and general symptoms in Dallas participants, but lower severity of negative symptoms in this group. In line with this finding, we found that participants from the Dallas site scored significantly higher on the Paranoia Scale. As noted in the main manuscript, the number of “threatening responses” correlated positively with paranoia severity, and we therefore found moderate to large differences in the Implicit Bodily Processing Task with a much higher number of “threatening responses” at Dallas site. Differences across sites thus appear to be driven by different levels of positive symptom severity.

Subjective and clinician-rated social functioning were comparable between sites. We did not find significant differences across sites in neurocognitive or ER – 40 performance. However, patient samples did differ on BR – 100 such that the Bratislava sample performed better.

**Supplemental Table 1** Comparison of patient samples across sites

|  | UTD | | BA | | Cohen`s d |
| --- | --- | --- | --- | --- | --- |
|  | M | SD | M | SD |
| PSP | 65.24 | 13.86 | 63.06 | 14.11 | 0.16 |
| SLOF - Interpersonal Relationships | 3.37 | 1.30 | 3.17 | 1.20 | 0.19 |
| SLOF - Social Appropriatedness | 4.24 | .66 | 4.40 | .49 | -0.27 |
| ER - 40 | 79.76 | 9.5 | 78.47 | 9.82 | 0.14 |
| BR - 100 | 73.66 | 13.49 | 78.94 | 15.47 | -0.36 |
| Angry primes | 57 | 22 | 36 | 26 | 0.86 |
| Happy primes | 41 | 20 | 23 | 20 | 0.92 |
| Neutral primes | 37 | 23 | 26 | 17 | 0.52 |
| Total primes | 45 | 13 | 29 | 17 | 1.08 |
| Paranoia Scale | 56.44 | 18.90 | 40.39 | 15.41 | 0.93 |
| PANSS - Positive | 17.39 | 5.16 | 12.11 | 4.39 | 1.10 |
| PANSS - Negative | 11.80 | 4.37 | 16.33 | 5.65 | -0.90 |
| PANSS - General | 32.37 | 8.25 | 27.44 | 5.37 | 0.71 |
| Trails A | 36.11 | 16.90 | 38.00 | 13.43 | -0.12 |
| Symbol Coding | 44.78 | 10.45 | 44.56 | 9.33 | 0.02 |
| Letter Nubmber Sequencing | 12.46 | 3.70 | 12.17 | 2.71 | 0.09 |
| Animal Fluency | 21.49 | 5.43 | 21.22 | 4.75 | 0.05 |

**Supplemental Table 2. Descriptive statistics for cognitive performance functional outcomes**

|  | HC | | SCZ | | Cohen`s d |
| --- | --- | --- | --- | --- | --- |
|  | M | SD | M | SD |
| PSP - Socially useful activities | 1.03 | 0.16 | 2.34 | 0.92 | -1.98 |
| PSP - Personal and social relationships | 1.24 | 0.49 | 2.56 | 1.12 | -1.52 |
| PSP - Self-care | 1.03 | 0.16 | 1.58 | 0.95 | -0.81 |
| PSP - Disturbing and aggressive behaviors | 1.14 | 0.35 | 1.80 | 0.87 | -1.00 |
| PSP - Total score | 87.05 | 10.27 | 64.58 | 13.85 | 1.84 |
| SLOF - Interpersonal Relationships | 4.19 | 0.70 | 3.31 | 1.03 | 1.01 |
| SLOF – Social Appropriateness | 4.72 | 0.22 | 4.29 | 0.62 | 0.93 |
| Trails A | 25.43 | 9.05 | 36.68 | 15.83 | -0.87 |
| Symbol Coding | 54.08 | 11.04 | 44.71 | 10.04 | 0.89 |
| Letter Number Span | 14.78 | 3.31 | 12.37 | 3.40 | 0.72 |
| Animal Fluency | 21.92 | 4.87 | 21.41 | 5.19 | 0.10 |

HC - Healthy controls, SCZ – Schizophrenia, Higher PSP Total score represents better overall functioning. Higher score on PSP domain score means more severe problems.
